# Supplementary material
Source: bioRxiv or medRxiv preprint supplement (https://www.medrxiv.org/highwire/filestream/74930/field_highwire_adjunct_files/1/2020.03.30.20045740-2.pdf)
Supplement: Supplementary file [file 2020.03.30.20045740-2.pdf]

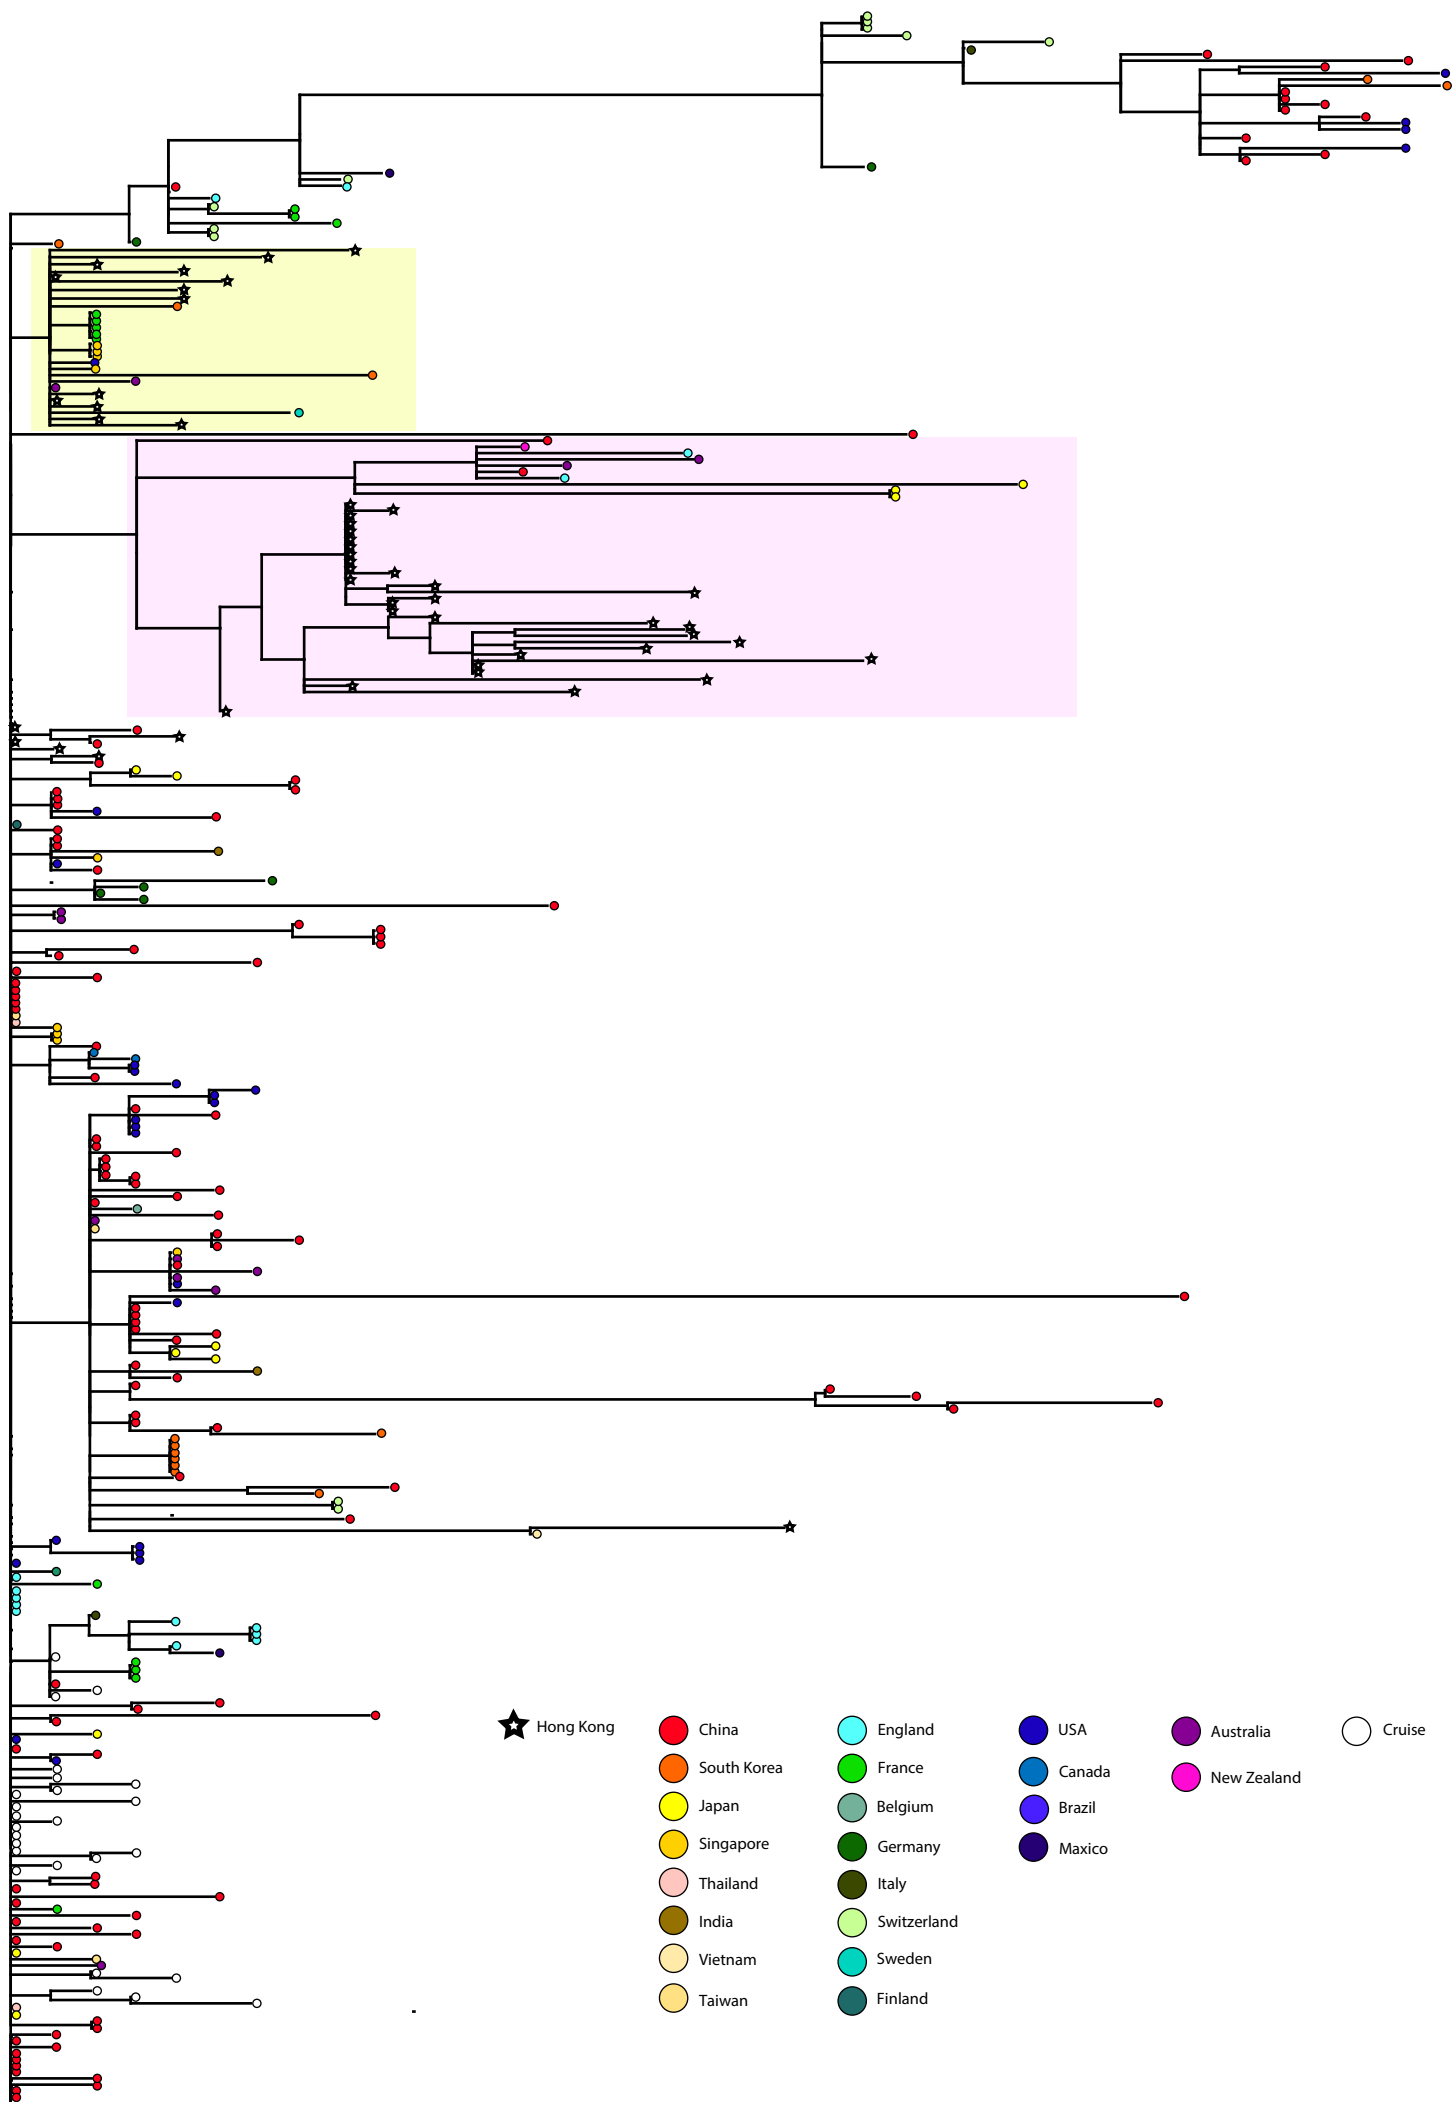

0.00250
